# Supplementary material for: Early In-Bed Cycle Ergometry With Critically Ill, Mechanically Ventilated Patients: Statistical Analysis Plan for CYCLE (Critical Care Cycling to Improve Lower Extremity Strength), an International, Multicenter, Randomized Clinical Trial
Source: JMIR Res Protoc. 2024 Oct 28;13:e54451. doi: 10.2196/54451 (PMC11555464; doi:10.2196/54451)
Supplement: Multimedia Appendix 2 [file resprot_v13i1e54451_app2.docx]

**Appendix 2.** CONSORT (CONsolidated Standards Of Reporting Trials) Checklist

| Section/Topic | Item No | Checklist item | Document, document section, page number reported |
| --- | --- | --- | --- |
| Title and abstract | | | |
|  | 1a | Identification as a randomised trial in the title | Title page |
| 1b | Structured summary of trial design, methods, results, and conclusions (for specific guidance see CONSORT for abstracts) | Abstract, pgs. 3-4 |
| Introduction | | | |
| Background and objectives | 2a | Scientific background and explanation of rationale | Introduction, pg. 5 |
| 2b | Specific objectives or hypotheses | Introduction, pg. 5 |
| Methods | | | |
| Trial design | 3a | Description of trial design (such as parallel, factorial) including allocation ratio | Methods, Trial design, pg. 5 |
| 3b | Important changes to methods after trial commencement (such as eligibility criteria), with reasons | N/A |
| Participants | 4a | Eligibility criteria for participants | Methods, Eligibility, pg. 6 |
| 4b | Settings and locations where the data were collected | Methods, Sites, pg. 6 |
|  | 5 | The interventions for each group with sufficient details to allow replication, including how and when they were actually administered | Methods, Intervention and Comparator, pg. 7 |
| Outcomes | 6a | Completely defined pre-specified primary and secondary outcome measures, including how and when they were assessed | Methods, Outcomes, pgs. 7-12 |
| 6b | Any changes to trial outcomes after the trial commenced, with reasons | N/A |
| Sample size | 7a | How sample size was determined | Methods, Sample Size, pgs. 13-14 |
| 7b | When applicable, explanation of any interim analyses and stopping guidelines | Methods, Interim Analysis, pg. 14 |
| Randomisation: |  |  |  |
| Sequence generation | 8a | Method used to generate the random allocation sequence | Methods, Randomization, pg. 7 |
| 8b | Type of randomisation; details of any restriction (such as blocking and block size) | Methods, Randomization, pg. 7 |
| Allocation concealment mechanism | 9 | Mechanism used to implement the random allocation sequence (such as sequentially numbered containers), describing any steps taken to conceal the sequence until interventions were assigned | Methods, Randomization, pg. 7 |
| Implementation | 10 | Who generated the random allocation sequence, who enrolled participants, and who assigned participants to interventions | Methods, Randomization, pg. 7 |
| Blinding | 11a | If done, who was blinded after assignment to interventions (for example, participants, care providers, those assessing outcomes) and how | Methods, Design, pg. 5(Treatment providers and outcomes assessors)  Methods, Interim Analysis, pg. 14 (statisticians/trial personnel) |
| 11b | If relevant, description of the similarity of interventions | N/A |
| Statistical methods | 12a | Statistical methods used to compare groups for primary and secondary outcomes | Methods, Outcomes, Tables 3-4 |
| 12b | Methods for additional analyses, such as subgroup analyses and adjusted analyses | Methods, Outcomes, Table 3 |
| Results | | | |
| Participant flow (a diagram is strongly recommended) | 13a | For each group, the numbers of participants who were randomly assigned, received intended treatment, and were analysed for the primary outcome | Draft version, Figure 1 |
| 13b | For each group, losses and exclusions after randomisation, together with reasons | N/A |
| Recruitment | 14a | Dates defining the periods of recruitment and follow-up | N/A |
| 14b | Why the trial ended or was stopped | N/A |
| Baseline data | 15 | A table showing baseline demographic and clinical characteristics for each group | N/A |
| Numbers analysed | 16 | For each group, number of participants (denominator) included in each analysis and whether the analysis was by original assigned groups | N/A |
| Outcomes and estimation | 17a | For each primary and secondary outcome, results for each group, and the estimated effect size and its precision (such as 95% confidence interval) | N/A |
| 17b | For binary outcomes, presentation of both absolute and relative effect sizes is recommended | N/A |
| Ancillary analyses | 18 | Results of any other analyses performed, including subgroup analyses and adjusted analyses, distinguishing pre-specified from exploratory | N/A |
| Harms | 19 | All important harms or unintended effects in each group (for specific guidance see CONSORT for harms) | N/A |
| Discussion | | | |
| Limitations | 20 | Trial limitations, addressing sources of potential bias, imprecision, and, if relevant, multiplicity of analyses | N/A |
| Generalisability | 21 | Generalisability (external validity, applicability) of the trial findings | N/A |
| Interpretation | 22 | Interpretation consistent with results, balancing benefits and harms, and considering other relevant evidence | N/A |
| Other information | | |  |
| Registration | 23 | Registration number and name of trial registry | Funding, Registration, and Ethics Approval, pg. 22 |
| Protocol | 24 | Where the full trial protocol can be accessed, if available | Discussion, pg. 23 |
| Funding | 25 | Sources of funding and other support (such as supply of drugs), role of funders | Funding, Registration, and Ethics Approval, pg. 22 |
